# Supplementary material
Source: MDPI journal article supplement (https://www.mdpi.com/2076-3417/13/14/8475)
Supplement: s1 [file s1]

# **Fundamental Investigations of the Deformation Behavior of Single-Crystal Ni-Mn-Ga Alloys and Their Polymer Composites via the Introduction of Various Fields**

**Wan-Ting Chiu <sup>\*</sup>, Motoki Okuno <sup>†</sup>, Masaki Tahara, Tomonari Inamura and Hideki Hosoda**

Institute of Innovative Research (IIR), Tokyo Institute of Technology, 4259 Nagatsuta-cho, Midori-ku, Yokohama 226-8503, Japan

<sup>\*</sup> Correspondence: [chiu.w.aa@m.titech.ac.jp](mailto:chiu.w.aa@m.titech.ac.jp)

<sup>†</sup> Current Affiliation: Honda R&D Co., Ltd., Saitama 351-0113, Japan.

**(a) Universal testing machine**

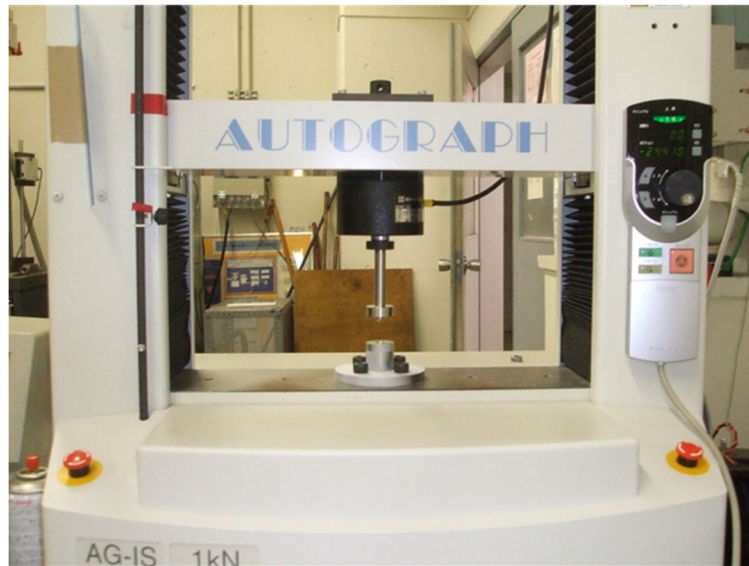

**(b) Jig for compression test**

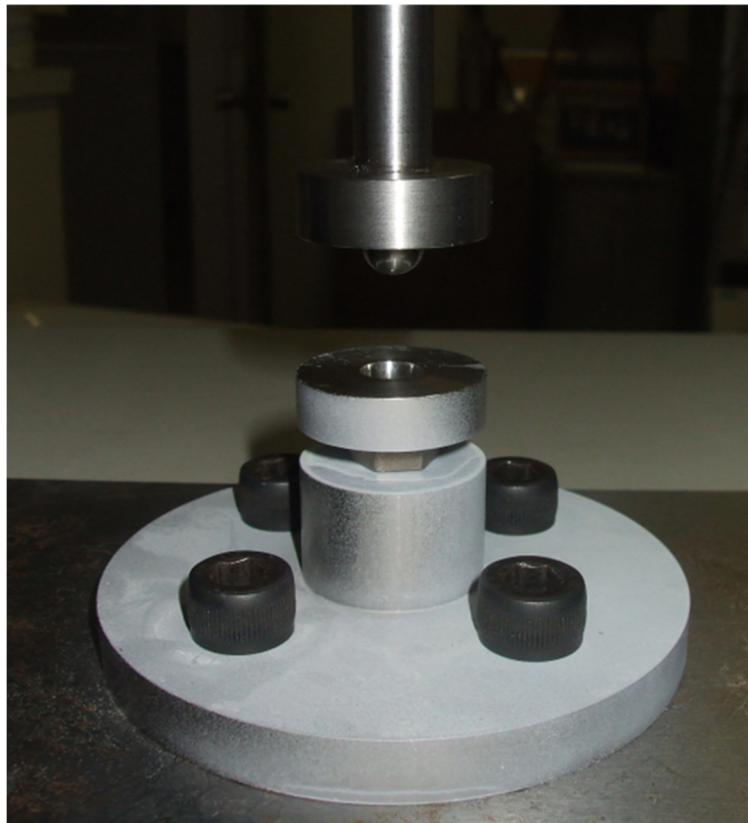

**Figure S1** Photos of (a) the universal testing machine and (b) the zoomed-in jig regime for conducting compression tests.

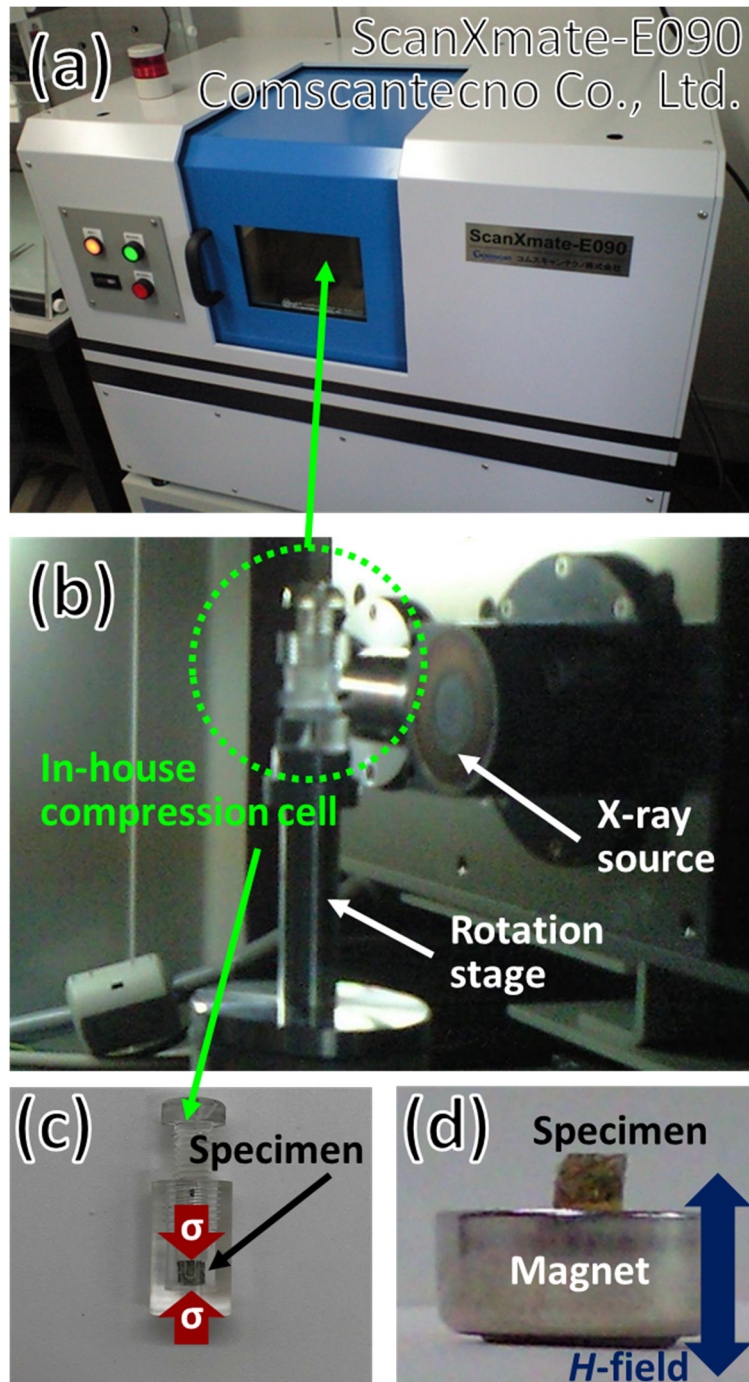

**Figure S2** (a) The main chamber of the  $\mu$ CT, (b) setting of the in-house compression on the rotation stage in the main chamber, (c) setting of the specimen in the in-house compression cell, and (d) setting of the specimen on the magnet.

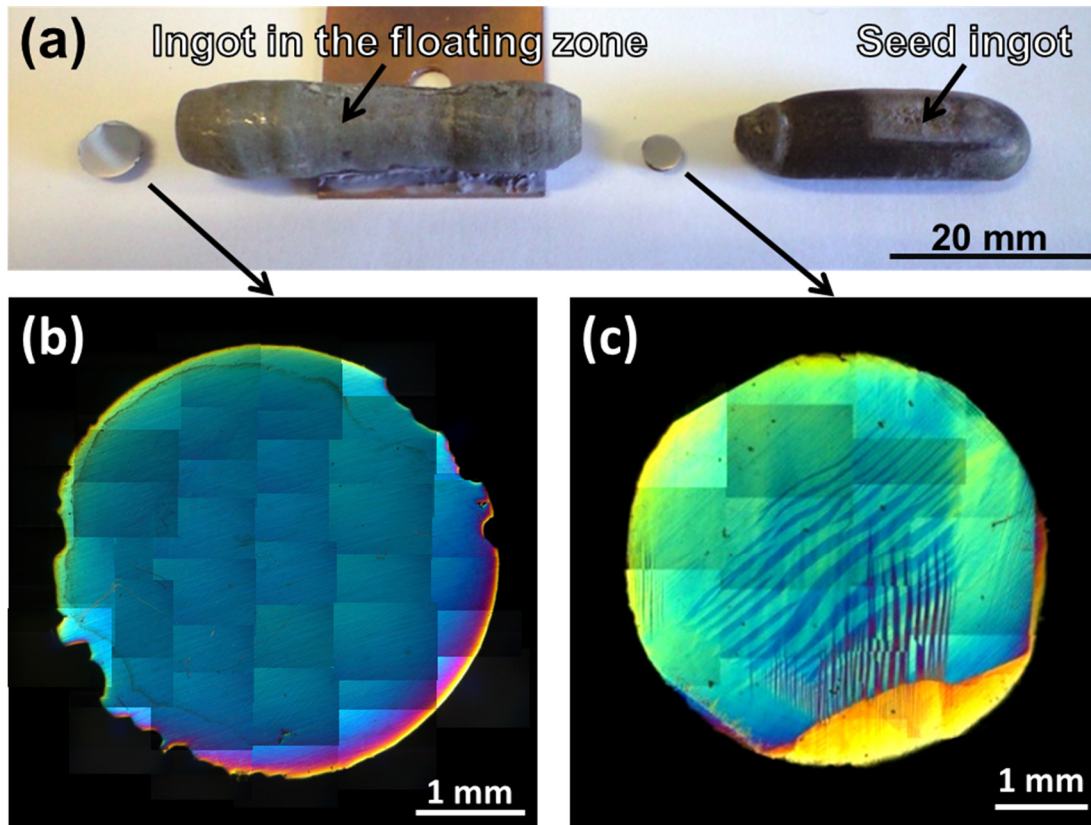

**Figure S3** (a) SC Ni-Mn-Ga ingot prepared by a floating zone method and (b, c) the corresponding OM images of the plates sliced down from different places of the ingot.

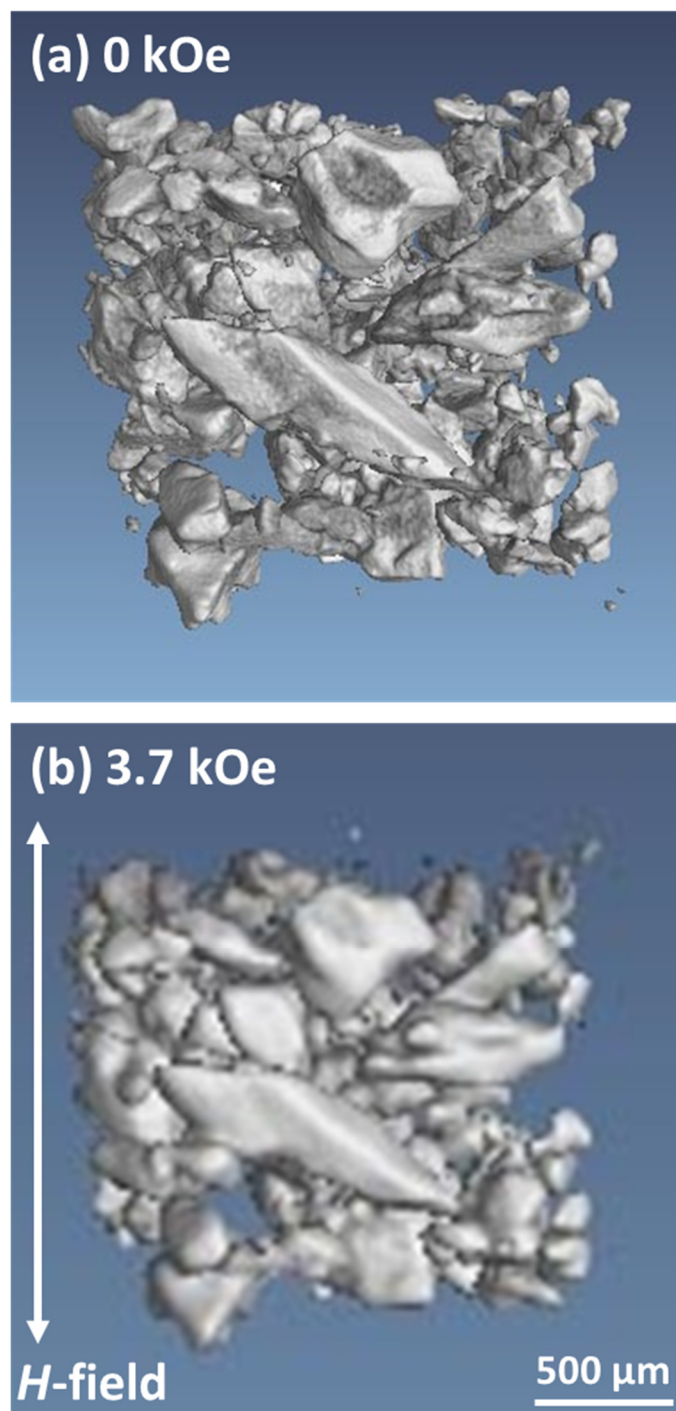

**Figure S4** The  $\mu$ CT images of the 10 vol.% SC Ni-Mn-Ga particles/silicone composite (a) before and (b) after the introduction of the 3.7 kOe magnetic field by using a magnet.

**Table S1** Comparison of the Ni-Mn-Ga alloys composed composites.

| Specimen                      | Apparent phase                                      | Applied field                  | Deformation strain                                                | Others                                                                                                            | Ref.       |
|-------------------------------|-----------------------------------------------------|--------------------------------|-------------------------------------------------------------------|-------------------------------------------------------------------------------------------------------------------|------------|
| SC Ni-Mn-Ga cube/silicone     | 5M martensite                                       | Magnetic field                 | ~4% (macro)                                                       | •30 vol.% particles                                                                                               | [35]       |
| SC Ni-Mn-Ga cube/silicone     | 5M martensite (major)<br>+<br>7M martensite (minor) | Compression                    | ~3.5% (5M martensite)<br>~5.5% (7M martensite)<br>(micro strains) | •20 vol.% particles                                                                                               | [38]       |
| SC Ni-Mn-Ga cube/silicone     | 5M martensite                                       | Magnetic field                 | --                                                                | •7 vol.% cube<br>•13 vol.% cube<br>•23 vol.% cube                                                                 | [39]       |
| SC Ni-Mn-Ga cube/silicone     | 5M martensite (major)<br>+<br>7M martensite (minor) | Magnetic field                 | ~4% (macro)                                                       | •20 vol.% particles                                                                                               | [41]       |
| SC Ni-Mn-Ga cube/silicone     | 7M martensite                                       | Magnetic field                 | --                                                                | •Opened surface one-cube (10 vol.% Ni-Mn-Ga alloy)                                                                | [46]       |
| SC Ni-Mn-Ga cube(s)/epoxy     | 5M martensite                                       | Compression/<br>Magnetic field | ~3.6% (by $\sigma$ -field)<br>~0.26% (by $H$ -field)              | •One-cube (30 vol.% Ni-Mn-Ga alloy)<br>•One-cube (30 vol.% Ni-Mn-Ga alloy)<br>•Two-cube (20 vol.% Ni-Mn-Ga alloy) | [47]       |
| SC Ni-Mn-Ga cube(s)/silicone  | 5M martensite                                       | Compression/<br>Magnetic field | 2%~3% (by $\sigma$ -field)                                        | •Two-cube (25 vol.% Ni-Mn-Ga alloy)<br>•Two-plate (50 vol.% Ni-Mn-Ga alloy)                                       | [47]       |
| SC Ni-Mn-Ga particles/Cu foil | 5M martensite                                       | Magnetic field                 | 2.7% (micro)<br>~3% (macro)                                       | Sandwich structure (layered composite)                                                                            | [48]       |
| SC Ni-Mn-Ga particles/epoxy   | 5M martensite                                       | Compression/<br>Magnetic field | 2%                                                                | •One-particle<br>•10 vol.% particles<br>•40 vol.% particles                                                       | This study |
| SC Ni-Mn-Ga alloys/silicone   | 5M martensite                                       | Compression/<br>Magnetic field | --                                                                | •10 vol.% particles<br>•20 vol.% particles<br>•40 vol.% particles                                                 | This study |
